# Supplementary material for: A Bayesian phylogenetic hidden Markov model for B cell receptor sequence analysis
Source: PubMed Central journal article supplement (PMC7451993; doi:10.1371/journal.pcbi.1008030), 2020-08-17
Supplement: pcbi.1008030.s001.pdf [file pcbi.1008030.s001.pdf]

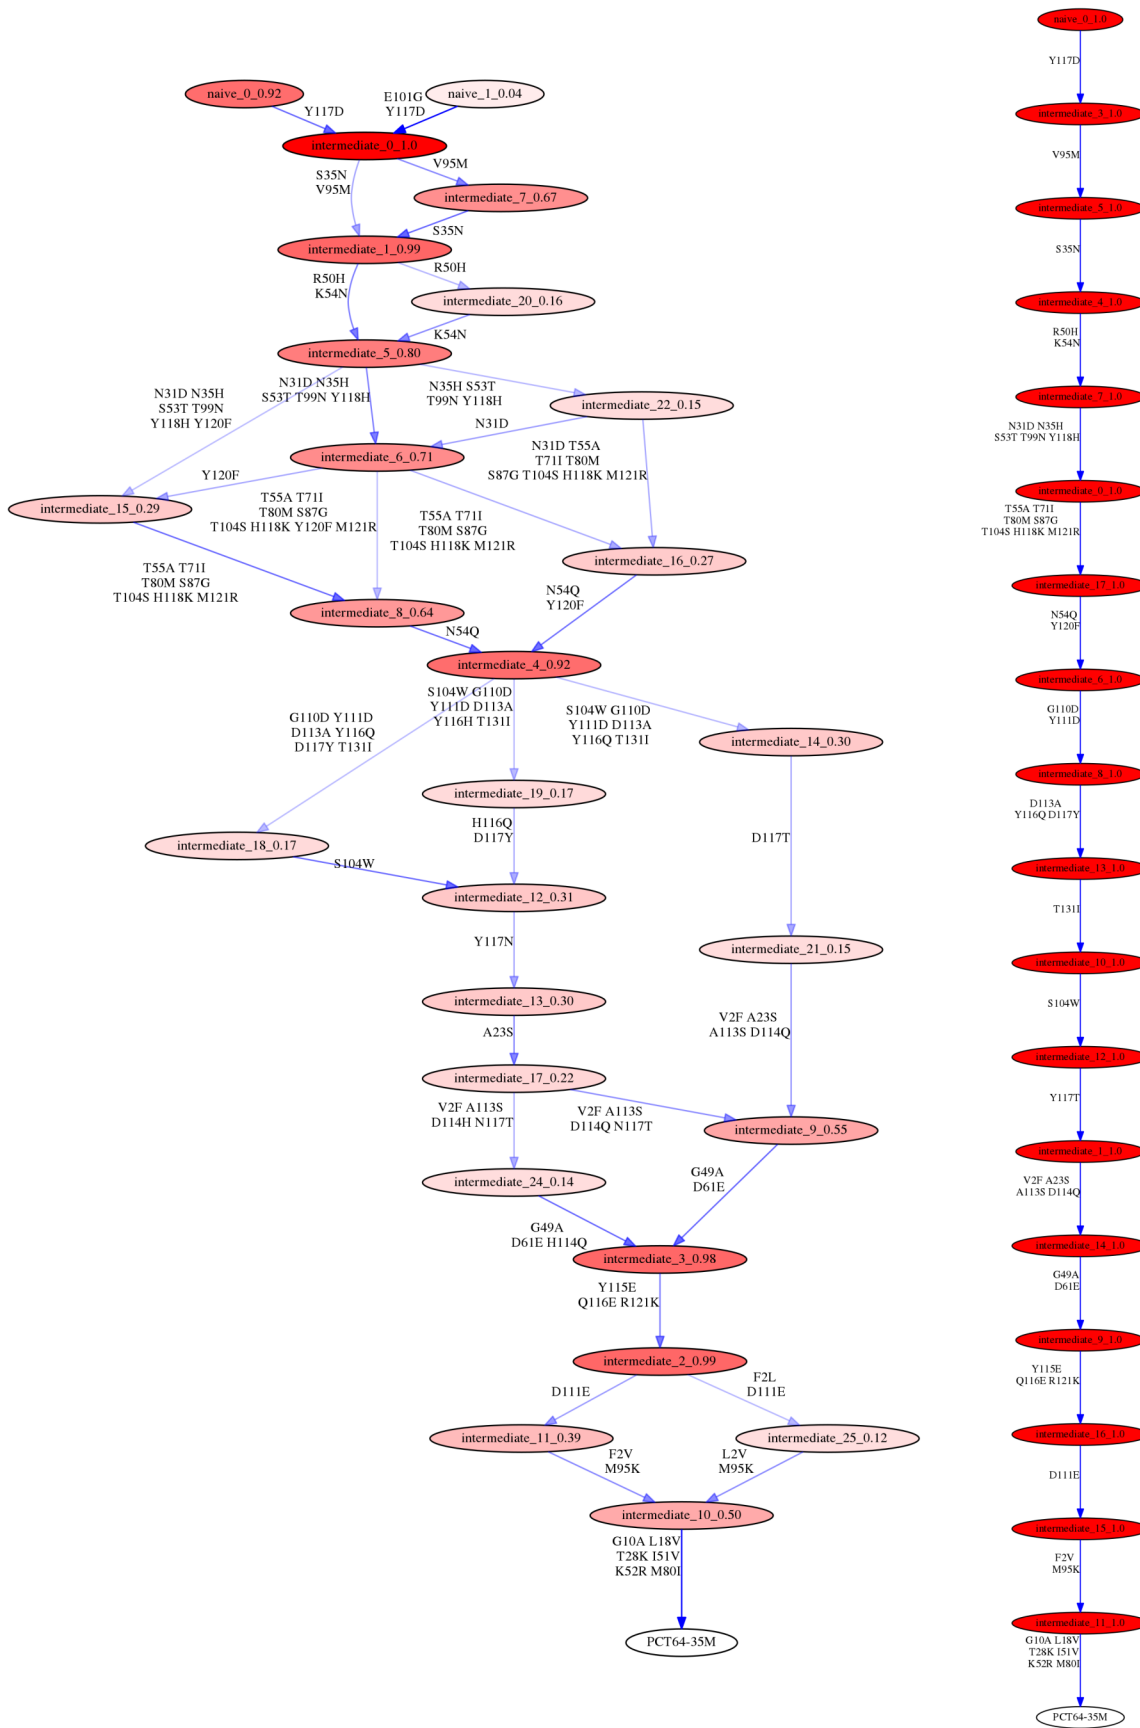

(a) PC64 posterior probability lineage inference

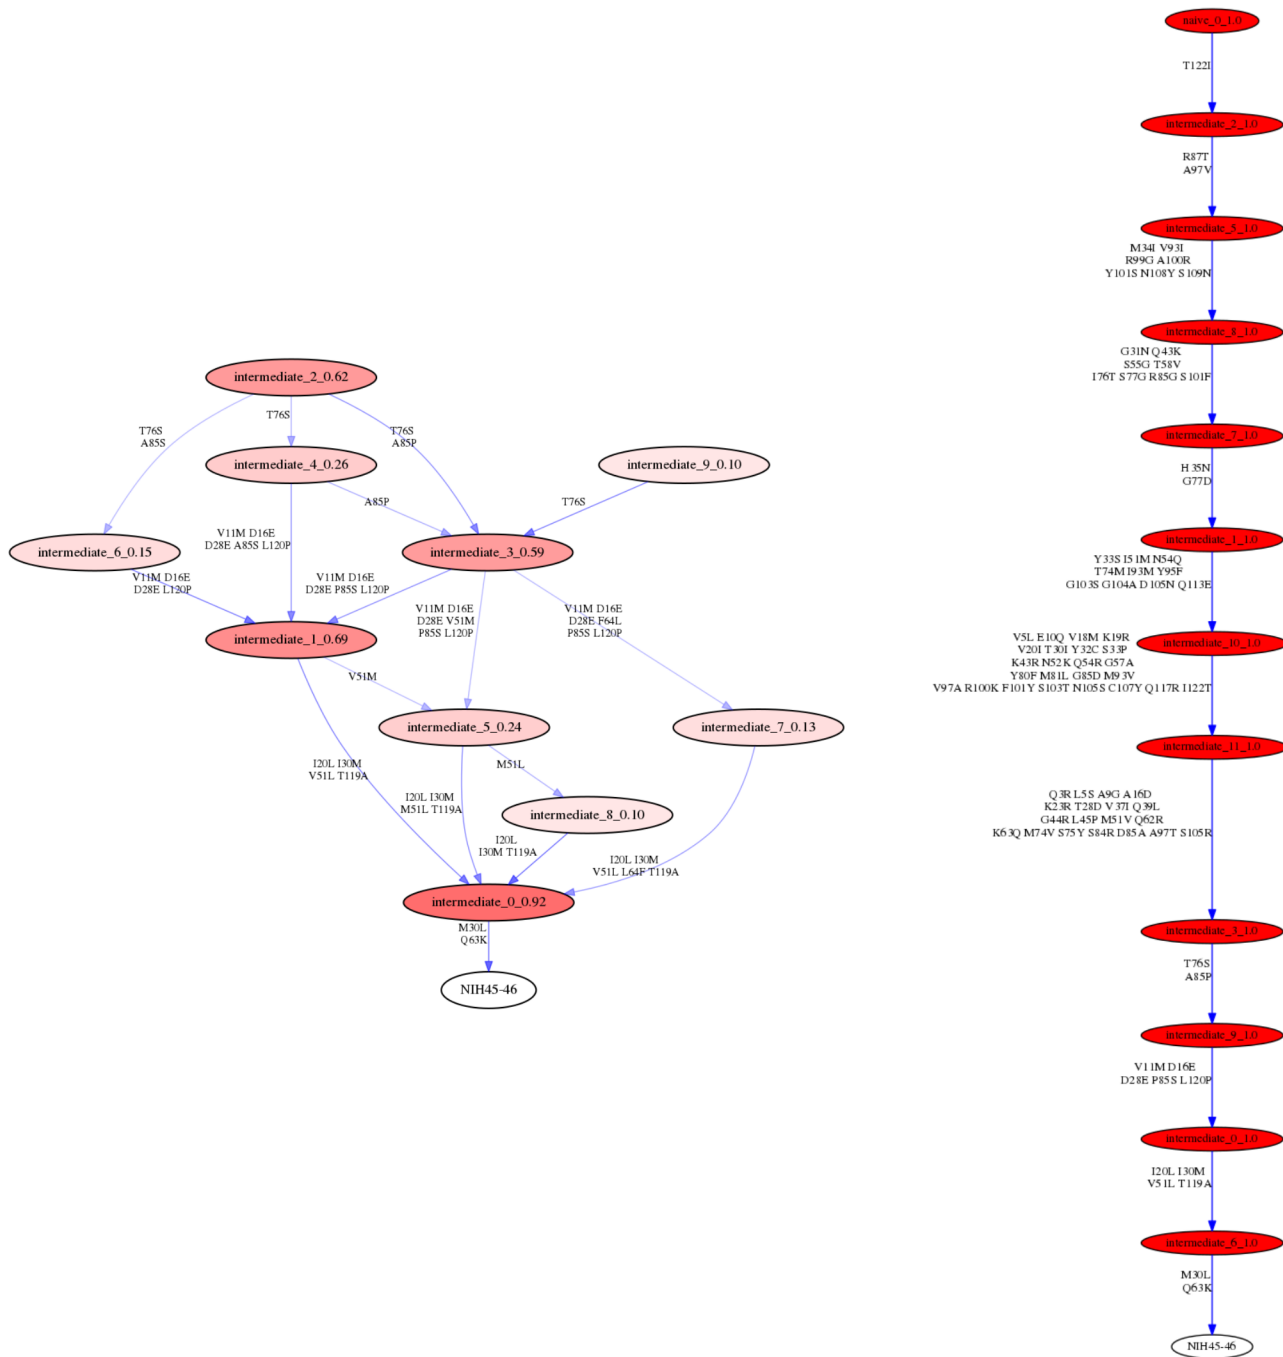

(b) VRC01 posterior probability lineage inference
